# A Comprehensive Model of the Spatio-Temporal Stem Cell and Tissue Organisation in the Intestinal Crypt

Peter Buske<sup>1,3\*</sup>, Jörg Galle<sup>1,3</sup>, Nick Barker<sup>2</sup>, Gabriela Aust<sup>3</sup>, Hans Clevers<sup>2</sup>, Markus Loeffler<sup>1,4</sup>

**1** Interdisciplinary Centre for Bioinformatics, University Leipzig, Leipzig, Germany, **2** Hubrecht Institute, University Medical Center, Utrecht, The Netherlands, **3** Center of Surgery, Research Laboratories, University Leipzig, Leipzig, Germany, **4** Institute for Medical Informatics, Statistics and Epidemiology, University Leipzig, Leipzig, Germany

## Abstract

We introduce a novel dynamic model of stem cell and tissue organisation in murine intestinal crypts. Integrating the molecular, cellular and tissue level of description, this model links a broad spectrum of experimental observations encompassing spatially confined cell proliferation, directed cell migration, multiple cell lineage decisions and clonal competition. Using computational simulations we demonstrate that the model is capable of quantitatively describing and predicting the dynamic behaviour of the intestinal tissue during steady state as well as after cell damage and following selective gain or loss of gene function manipulations affecting Wnt- and Notch-signalling. Our simulation results suggest that reversibility and flexibility of cellular decisions are key elements of robust tissue organisation of the intestine. We predict that the tissue should be able to fully recover after complete elimination of cellular subpopulations including subpopulations deemed to be functional stem cells. This challenges current views of tissue stem cell organisation.

**Citation:** Buske P, Galle J, Barker N, Aust G, Clevers H, et al. (2011) A Comprehensive Model of the Spatio-Temporal Stem Cell and Tissue Organisation in the Intestinal Crypt. *PLoS Comput Biol* 7(1): e1001045. doi:10.1371/journal.pcbi.1001045

**Editor:** Douglas Lauffenburger, Massachusetts Institute of Technology, United States of America

**Received:** July 4, 2010; **Accepted:** December 1, 2010; **Published:** January 6, 2011

**Copyright:** © 2011 Buske et al. This is an open-access article distributed under the terms of the Creative Commons Attribution License, which permits unrestricted use, distribution, and reproduction in any medium, provided the original author and source are credited.

**Funding:** This study was supported by the European Commission project EuroSyStem. The funders had no role in study design, data collection and analysis, decision to publish, or preparation of the manuscript.

**Competing Interests:** The authors have declared that no competing interests exist.

\* E-mail: buske@izbi.uni-leipzig.de

† These authors contributed equally to this work.

## Introduction

The epithelium of the small intestine is the most rapidly regenerating tissue of adult mammals. Cell production starts near the crypt base, producing numerous progeny which move up the crypt-villus axis. Cells moving up the crypt continue proliferating while in parallel becoming committed either to an absorptive or a secretory fate. Cells stop proliferating and differentiate while approaching the crypt-villus junction. Upon reaching the villus tip a few days later cells are shed into the lumen of the intestine. As an exception, cells that become committed to the secretory Paneth lineage move down the crypt-villus axis whilst differentiating until they occupy their final position at the very bottom of the crypt. These cells have a life time of up to 8 weeks [1]. A histological section through this system is shown in Fig. 1a.

Tissue and stem cell organisation of the adult small intestine has been studied extensively [2,3,4]. There are indications that functional intestinal stem cells are localized in specific niche positions characterized by specific markers [5]. *Lgr5* and *Bmi1* expression were both demonstrated to be features of cells capable of self-renewal and of generating differentiated progeny [6,7] hence fulfilling the functional stem cell criterion [8]. Additional markers have been suggested [9], [10]. The relationship between these cellular phenotypes and the stem cell functionality is presently not fully understood.

The nature of the microenvironment that harbours and possibly conditions the functional stem cells is also not fully elucidated. Activation of the Wnt- and Notch- pathway was demonstrated to be essential for stem cell maintenance as well as proliferation and differentiation [11,12]. These experiments also showed that cell

fate and cell lineage decisions can be rapidly and dramatically shifted by activating gain or loss of gene function in these signalling pathways. Such data implicate the idea of flexibly switching cell activity modes on and off by controlling the local signalling environment and hence challenge the classical view of tissue stem cell organisation based on a pedigree concept [8].

The classical ‘pedigree concept’ of hierarchical tissue organization regards ‘stemness’ as a cellular property essentially fixed intrinsically to specified cells called stem cells annotating them as a specific cell type. These cells are assumed to divide asymmetrically and to give rise to a new stem cell and to a non-stem progenitor cell. Subsequently, the progenitor cell undergoes transient amplifying divisions before it differentiates terminally. In this pedigree model lineage specification is linked to cell stages in the cellular differentiation hierarchy. It is one of our objectives here to demonstrate that the pedigree related assumptions on stem cell populations are not required in order to provide a comprehensive explanation of the tissue self organisation and that an alternative concept can be more powerful.

Our approach is based on concepts of self-organizing systems assigning a greater emphasis to the interaction between cells and their environment. Moreover, they enable reversible developments for individual cells, allowing the system to flexibly react to changing demands [13,14,15]. Applying these general concepts we designed a comprehensive and predictive 3D individual cell-based model of the organisation and cell turnover of murine intestinal crypts. The model includes representations of basic molecular regulation mechanisms of proliferation and lineage specification based on Wnt- and Notch-signalling and all major aspects of stem cell function. We use the model to describe steady state cell

## Author Summary

In the murine small intestine there are more than a million organized groups of proliferating cells, the crypts, each of which contains about 250–300 cells. About 60% of these cells are in rapid cycle. The functional stem cells of this tissue have been demonstrated to reside at defined positions at the lower third of the crypt and to give rise to four different cell types. Considering this simple structure the murine intestine is an ideal system to study general aspects of tissue organization. Here, we introduce a comprehensive and predictive computer model of the spatio-temporal organization of the murine intestine which describes how cell production and cell fate decisions could be organized in steady state as well as under perturbations. The model is based on single cells acting as individual agents, updating their status within a certain set of options governed by some active rules and on signals received from the environment. This kind of self-organization enables effective tissue regeneration without assuming an explicit stem cell population that maintains itself by asymmetric division. Thus, the model offers a novel systems biological view on crypt stem cell and tissue organisation.

turnover and conversion dynamics of clonally labelled cells. Moreover, the lineage specification and cell differentiation within the crypt is described, as well as changes it undergoes subsequent to gain and loss of gene function and physical tissue damage.

## Results

### Model description

**Cells.** Cells are represented by elastic objects which can move, grow and divide, form contacts with other cells and the basal membrane (BM) and can communicate with one another. The extent by which these properties are expressed depends on the internal state vector  $\Omega$  of each cell. An important feature covered by  $\Omega$  is the activity status, i.e. the transcription of target genes, of the Wnt- and Notch-pathway denoted by  $I_{Wnt}$  and  $I_{Notch}$ , respectively.

**Wnt-signalling.** Wnt-signalling in intestinal crypts has been extensively studied [16]. The central player in the canonical Wnt-pathway is  $\beta$ -catenin. While  $\beta$ -catenin is targeted for proteosomal degradation in absence of a Wnt-signal, in presence of this signal it can accumulate in the cell. Coincident translocation of  $\beta$ -catenin into the nucleus results in binding to transcription factors of the TCF/LEF family and leads to activation of target genes. For a detailed description see e.g. [17]. Wnt-signalling in crypt cells was observed to be highest at the crypt bottom and to decrease continuously along the crypt-villus axis [18]. This Wnt-gradient is conserved during loss of cell sorting in the intestine, leading to the suggestions that its formation is essentially a non cell-autonomous process [19]. Using genetically engineered mice it has been shown that secretory cells are dispensable for differential Wnt-activity in the crypts [20,21]. Recently, using *in vitro* culture of primary intestinal cells it has been demonstrated that stroma cells are not required for induction of this gradient and to generate functional tissue [22]. The same study demonstrates that the Wnt-activity gradient forms in crypts even if a constant high concentration of the Wnt agonist R-Spondin1 is provided to all cells. This led us to the hypothesis that the formation of the Wnt-activity gradient in the crypt is largely independent of the expression of Wnt-molecules. On the other hand positive surface curvature was

demonstrated to induce growth activity in several epithelia [23,24]. In crypts it is highest at the bottom cap (see Fig. 1b). We therefore assume in our model that Wnt-activity is determined by the local curvature of the basal membrane. Consequently, the internal state  $\Omega$  of the cell depends on the local crypt shape.

**Notch-signalling.** Notch-signalling is mediated via transmembrane proteins. Thus, it requires cell-cell contacts. It is activated in Notch-receptor expressing cells if their neighbour cells express Notch-ligands such as Jagged and Delta [25]. Upon receptor-ligand binding, Notch proteins are cleaved by  $\gamma$ -secretase and in turn the Notch intracellular domain translocates to the nucleus, where it activates transcription of target genes [26]. In the crypt undifferentiated cells and cells of the absorptive lineage and their progenitors produce Notch (van Es & Clevers, unpublished data). In contrast, cells of the secretory lineages and their progenitors are assumed to express Notch-ligands. A Notch-activated cell is prevented from changing into a secretory lineage as long as its neighbour cells express sufficient Notch-ligands. This phenomenon is known as lateral inhibition [27]. Accordingly, we assume that the internal state of a cell depends not only on the crypt shape but also on the number and types of cell-cell contacts formed.

**Lineage specification and differentiation model.** In our model, lineage specification into enterocytes (absorptive lineage) and Paneth- and Goblet cells (secretory lineages) is assumed to depend on Wnt- and Notch-signalling [16,26]. For both pathways activity thresholds have been suggested (Wnt: [28], Notch: [29,30]). Accordingly, and in order to enable a cell type classification we assume the following threshold-dependent cell fates:

Cells with high Wnt- and high Notch-signalling, i.e. with  $I_{Wnt}$  and  $I_{Notch}$  above certain thresholds  $TP_{Wnt}$  and  $TP_{Notch}$ , respectively, are considered as undifferentiated ([16]. Notch-signalling was demonstrated to be required in order to avoid specification into a secretory lineage which seems otherwise to be a default mechanism [12,31]. Thus, we assume the secretory phenotypes to be related to low Notch-activity. Accordingly, undifferentiated cells with high  $I_{Wnt}$  become primed for switching on secretory properties if  $I_{Notch}$  drops below  $TP_{Notch}$ . This occurs if their neighbour cells do not express sufficient Notch-ligands. High Wnt-signalling is required for Paneth cell differentiation [21,32]. Moreover, at low Wnt-activity Paneth cells decrease in number while Goblet cells appear to be unaffected [33]. Thus, undifferentiated cells with high  $I_{Wnt}$  become primed for switching on Paneth properties.

Enterocytes are characterised by a low Wnt-activity compared to undifferentiated cells [33]. Their fate vanishes at constitutive high Wnt [34]. As a consequence we assume that an undifferentiated cell with high  $I_{Notch}$  becomes primed for switching on enterocyte properties if  $I_{Wnt}$  drops below the threshold  $TP_{Wnt}$ . This occurs if the cell reaches a position above  $x_p$  (Fig. 1b). In the line of arguments given for Paneth cell specification the enterocyte progenitor is switched to the Goblet property if in addition  $I_{Notch}$  falls below  $TP_{Notch}$ . In accordance with the concept of self-organizing systems [13,14,15] we assume priming to be reversible in general. We allow for any transition between the undifferentiated and progenitor cells and between different progenitor cells.

A primed cell can subsequently develop towards and may eventually reach an irreversible (terminal) differentiation state. Enterocyte and Goblet progenitors migrate out of the crypts and turn into differentiated cells if they reach a position near the crypt-villus junction [17]. As they move in a Wnt-gradient, we assume that they become irreversibly differentiated and stop their proliferation if  $I_{Wnt}$  falls below a threshold  $TD_{Wnt}$ , which happens

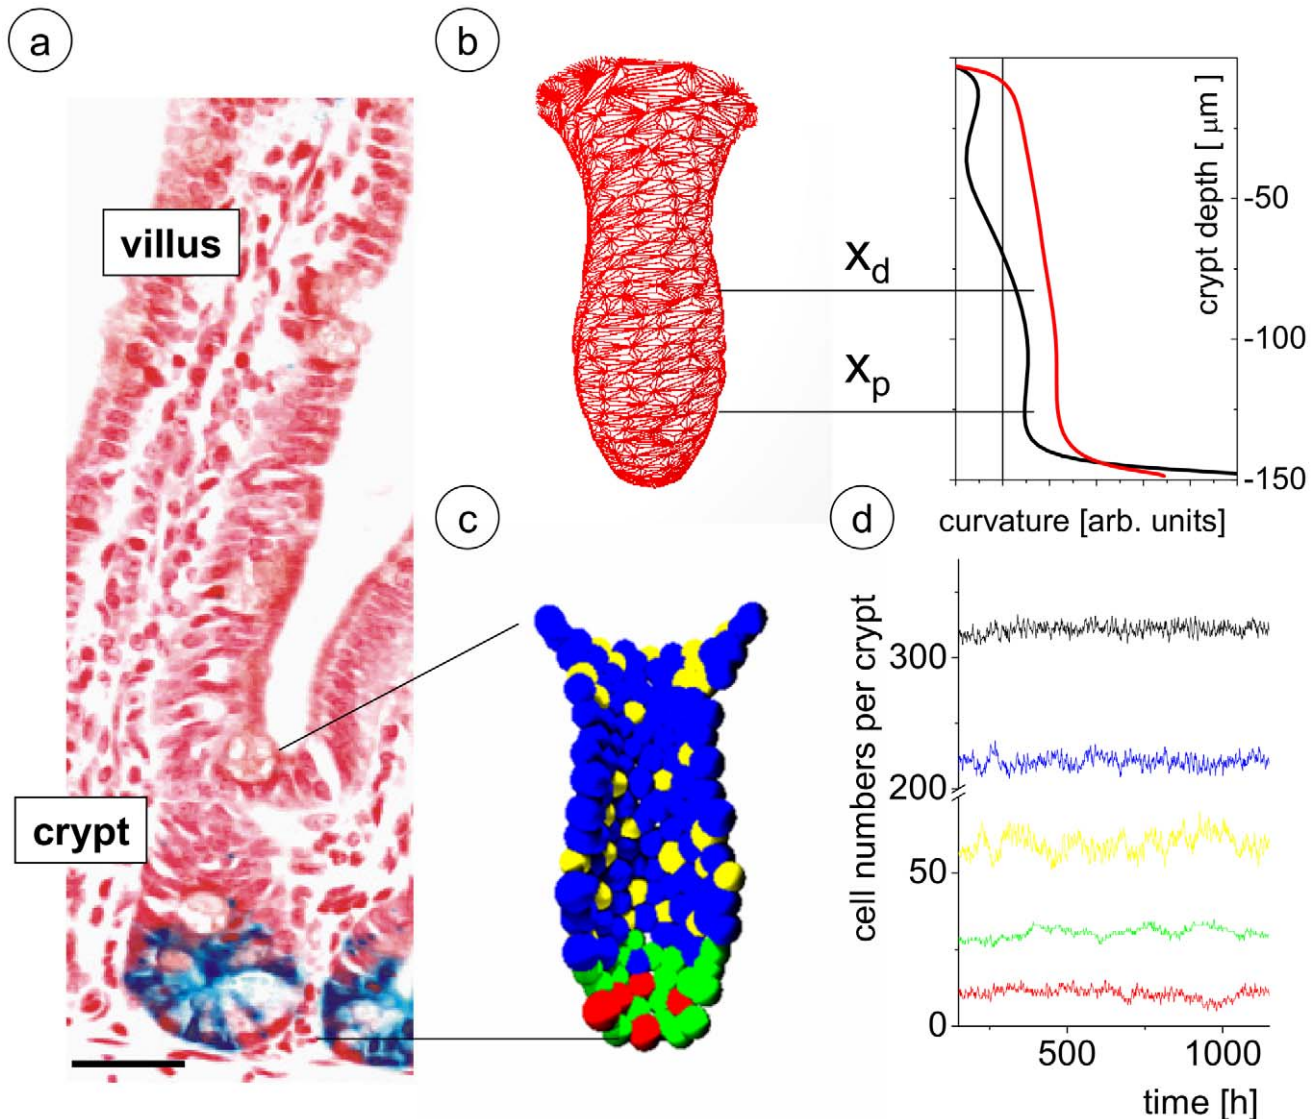

**Figure 1. Model of the murine small intestinal crypt.** a) Histological section. Expression of the functional stem cell marker Lgr5-LacZ (blue) is mainly restricted to a few cells at the crypt bottom [6] Bar: 50 $\mu$ m. b) Example of a model network representing the BM of the crypt. The Gaussian (black) and Mean (red) curvature [59] are highest at the crypt bottom. Wnt- activity is assumed to correlate with curvature and to adopt threshold values at position  $x_p$  and  $x_d$  (see text). c) Snapshot of a crypt simulation. Undifferentiated cells (red) and Paneth cells (green) are found intermingled at the crypt bottom, progenitors of enterocytes (blue) and Goblet cells (yellow) move upwards along the crypt axis. d) Steady state cell numbers over time. Colour code as in c). Black line denotes the total number of cells. doi:10.1371/journal.pcbi.1001045.g001

if the cells reach positions above  $x_d$  (Fig. 1b). Terminal differentiation of Paneth cells requires SOX9, a Wnt-target, and thus, high Wnt-activity [20,35]. Thus, no change in the considered Wnt-activity status is required. We assume that a Paneth cell reaches a terminal differentiation state after finishing its current cell cycle.

**Spatio-temporal self-organisation.** In our model the activity state of a cell is determined by its local environment (see above). As a result each conformational change of a cell changes its activity state and those of its neighbours. Accordingly lineage specification and differentiation strongly depend on cell migration, cell adhesion and cell elasticity which affect the spatio-temporal organisation of the crypt. These biomechanical features are modelled using an established individual cell-based model of epithelia [36,37]. In this model the biomechanical properties of the cells are described

by a set of experimentally accessible parameters. Simulations of the model are performed as ‘experiments in silico’ to be directly comparable to experimental results.

We assume identical biomechanical properties in all differentiation states, except for the migration properties. These properties were suggested to be controlled by the expression of Eph2/Eph3 receptors and their ligand ephrin-B1 [19]. Here, we assume Paneth cells progenitors to actively move down the crypt, whereas all other primed cells move actively upwards towards the crypt-villus junction. Active motion was modelled assuming that a ‘migration force’ acts on each cell. Passive cell motion is driven by all deterministic forces acting on a cell [37]. These forces refer to cell adhesion, deformation and compression. Details regarding the underlying cell-cell interactions are described in the Materials and Methods section (A1).

Besides the cell properties, properties of the basal membrane (BM) of the crypt also impact the spatio-temporal organisation process. We explicitly model the BM by an artificial fibre network that interacts with each individual cell. The shape and the size of the network representing the basal membrane was chosen in order to fit experimental data on crypt geometry [8]. Details regarding the construction of the BM network and the cell interactions with it can be found in the Materials and Methods section (A2).

**Proliferation and apoptosis.** Whether a cell proliferates depends on its differentiation state. Undifferentiated cells in the crypt are capable of proliferation [6]. Migrating up the crypt and becoming enterocyte progenitors they exit the cell cycle only if they become terminal differentiated while reaching the upper part of the crypt [17]. In contrast crypt cells in general stop proliferation after getting primed for a secretory lineage [26]. In our model proliferation is regulated according to the same rules. In general cells finish their actual cell cycle before entering a terminal differentiated state.

If a cell starts cycling, the cycle will be finished independently of changes in the differentiation state. Cell growth is modelled assuming stochastic growth steps. This leads to  $\Gamma$ -distributed growth times, where a cell doubles its volume. In our simulations the average value was adapted to about 16 hours. If the cell reaches twice the initial (minimal) volume it divides into two daughter cells of equal volume. Cells that are sufficiently compressed by their neighbour cells stop volume growth due to contact inhibition of growth [36]. Cells are removed from the crypt system if they lose contact with the basal membrane. They are thought to undergo anoikis [38]. If cells cross the crypt-villus junction they are aurally removed. This ensures zero pressure conditions at this boundary in the simulations. The villus is not modelled. Paneth cells are assumed to have a limited life-span of about 8 weeks [1]. Afterwards, they are removed from the crypt.

**System dynamics.** The system dynamics is described by equations of motion for each individual cell. Thereby, each update of the position and size of the cells potentially changes the internal state vector  $\Omega$  of each of them. Thus,  $\Omega$  is updated subsequently. Details are found in the Materials and Methods section (A3). Due to the self-organisation properties of our model, changes of any model parameter have a complex effect on the systems behaviour. While the model behaviour was obtained to agree qualitatively with experimental findings in wide parameter ranges, quantitative agreement required detailed fitting. Insight into this procedure is given in the Materials and Methods section (A4).

## Simulation results

**Modelling steady state cell production.** Our crypt model is capable of quantitatively reproducing steady state cell production (Fig. 1d). Thereby, the entire crypt has a turnover of about 2–3 days. The average spontaneous apoptosis rate within the crypt is below 5 per cent in agreement with results by Marshman et al. [39]. The parameter set used to obtain this dynamics is given in Table 1 (see Materials and Methods). It was obtained by fitting the model behaviour to data on the proliferation activity in murine intestinal crypts based on BrdU labelling experiments (details see Materials and Methods A5). The results of these experiments and their fits by our model are shown in Fig. 2a,b. A video of a crypt in steady state is shown in Video S1.

Steady state cell patterning in the model crypt results as a self-organized feature referring to the assumed modes of Notch- and Wnt-signalling. Undifferentiated functional stem cells, i.e. cells with high Wnt- and Notch-signalling are intermingled among the Paneth cells and appear up to cell position 4 and 5. Thus, they

match the distribution of LGR-5 positive cells reported by Barker et al. [6] (compare Fig. 1a,c). They also comprise that of the Bmi1-positive subpopulation [7]. All undifferentiated cells are capable of proliferating. We found about 94% of them to divide within less than 48h. However, a fraction of about 1% of the undifferentiated cells remains quiescent for more than 1 week and thus carries features of label retaining cells [9].

The model generates a Paneth cell population at the crypt bottom whose spatial distribution fits the data observed by Chwanlinski et al. [40] (Fig. 2c). Interestingly, Paneth cells are predominately induced between position 2 and 5 (Fig. 2c, insert) and move down the crypt. This is in agreement with the experimental observations by Bjerknes et al. [41]. Moreover, a spatial distribution of Goblet cells is generated which is very similar to the one reported by Paulus et al. [42] (Fig. 2d).

**Modelling clonal dynamics in the steady state.** Simulating steady state conditions, we studied the dynamics of clonal expansion and conversion to monoclonality. Technically, in the model all cells were labelled at one instance with a clonal marker that is inherited by all offspring. The number of coexisting clones was followed over time. In the long run, few clones survive and only one clone eventually populates the entire crypt. The life-span time of clones in the crypt depends on the initial position of the labelled cell. While clones of functional stem cells initially located at the bottom of the crypt are more likely to persist for a long time (Fig. 3a), the probability is dramatically reduced for progenitor cells at higher positions in the crypt (Fig. 3b) and drops to zero for terminal differentiated cells. Our observations on clonal coexistence and on conversion to monoclonality on a time scale of weeks (Fig. 3d, see also Video S2) are in agreement with experimental studies where random mutations of genetic clone markers were used [43,44].

**Modelling gain and loss of function mutants.** Our model also permits a better understanding of the prompt effects of conditionally de-regulated Wnt- and Notch- signalling. A constitutive activation of the Wnt-signalling was implemented in the model by increasing the Wnt-activity over  $TP_{Wnt}$  in all cells along the crypt-villus axis. This results in a rapid expansion of the functional stem cell and Paneth cell population at the expense of the enterocyte and Goblet cell population (Fig. 4, Wnt++). In parallel, the turnover of the system decreases. This is in accordance with the experimental results obtained by Sansom et al. [34] and Andreu et al. [21] studying APC-loss in transgenic mice. In contrast, functional stem and Paneth cells vanish if the Wnt-signalling is kept below  $TP_{Wnt}$  in all cells (Fig. 4, Wnt-). However, proliferative cells still remain in the crypt. A comparable behaviour was obtained by Fevr et al. [33] studying tissue-specific, inducible  $\beta$ -catenin gene ablation in adult mice.

Constitutive activation of Notch-signalling in all cells above  $TP_{Notch}$  resulted in a rapid Paneth- and Goblet- cell depletion and an increased cell turnover (Fig. 4, Notch++). Such behaviour was observed experimentally by Fre et al. [31] targeting the expression of a constitutively active form of the mouse Notch 1-receptor in all cells of the intestinal epithelium. A complete inhibition of Notch-signalling in all cells in turn leads to a conversion of stem cells into Paneth progenitors and of enterocyte into Goblet progenitors (Fig. 4, Notch-). Over time this results in changed proliferation activity throughout the crypt. This behaviour is in agreement with the findings by van Es et al. [12] demonstrating that inhibition of Notch-signalling by use of a  $\gamma$ -secretase inhibitors or removal of the transcription factor CSL leads to rapid Goblet cell conversion throughout the crypts.

**Robustness against elimination of subpopulations.** An essential model feature is the reversibility and flexibility of cell fate

**Table 1.** Parameters of the model.

| Symbol                                                                  | Value                             | Parameter                                                            | Reference                                                    |
|-------------------------------------------------------------------------|-----------------------------------|----------------------------------------------------------------------|--------------------------------------------------------------|
| <b>Parameter of the cell model</b>                                      |                                   |                                                                      |                                                              |
| $V_0$                                                                   | $4/3\pi (5\mu\text{m})^3$         | Minimal volume of an isolated cell                                   | Estimated                                                    |
| $\tau$                                                                  | 14 h                              | cell growth time                                                     | results in an effective cell cycle time $\sim 24\text{h}$    |
| $E$                                                                     | 1kPa                              | Young modulus                                                        | [36]                                                         |
| $\nu$                                                                   | 1/3                               | Poisson ratio                                                        | "                                                            |
| $\varepsilon_c$                                                         | 200 $\mu\text{N/m}$               | cell-cell anchorage                                                  | "                                                            |
| $V_p$                                                                   | 0.88 $V_0$                        | threshold volume of contact inhibition                               | Set                                                          |
| <b>Parameter of the BM model</b>                                        |                                   |                                                                      |                                                              |
| $z_0$                                                                   | 150 $\mu\text{m}$                 | length of the crypt                                                  | Set, according to measured properties of the crypt shape [8] |
| $r_0$                                                                   | 60 $\mu\text{m}$                  | crypt radius at the crypt-villus junction                            | "                                                            |
| $\lambda_1$                                                             | 0.25                              | shape parameter 1                                                    | "                                                            |
| $\lambda_2$                                                             | 0.1                               | shape parameter 2                                                    | "                                                            |
| $\lambda_{\text{MAX}}$                                                  | 1.25 $\mu\text{m}$                | maximum in-radius of a network triangle                              | Set (technical)                                              |
| $\Omega$                                                                | 0.95                              | threshold ratio                                                      | Set                                                          |
| $\varepsilon_K^{\text{Paneth}}$                                         | $35 \cdot 10^{-12} \text{ Nm}$    | maximum cell-knot interaction energy of Paneth cells                 | ensuring apoptosis rates $< 5\%$ [39]                        |
| $\varepsilon_K^{\text{other}}$                                          | $5.5 \cdot 10^{-12} \text{ Nm}$   | maximum cell-knot interaction energy of all other cells              |                                                              |
| <b>Parameter of crypt dynamics</b>                                      |                                   |                                                                      |                                                              |
| $\eta_c$                                                                | $5 \times 10^{10} \text{ Ns/m}^3$ | friction constant for cell-cell friction                             | [36]                                                         |
| $\eta_{\text{BM}}$                                                      | 3.2 Ns/m                          | friction coefficient for cell-BM friction                            | Fit: turnover                                                |
| $\eta_{\text{VO}}$                                                      | 400 Ns/m                          | friction coefficient regarding volume changes                        | [36]                                                         |
| $F_A^{\text{Paneth}}$                                                   | 7.5 nN                            | absolute value of the migration force of Paneth cells                | Fit: Distribution of Paneth cells                            |
| $F_A^{\text{other}}$                                                    | 4.5 nN                            | absolute value of the migration force of all other cells             | Fit: turnover and Brdu data                                  |
| <b>Parameter of the lineage specification and differentiation model</b> |                                   |                                                                      |                                                              |
| $z_p$                                                                   | -125 $\mu\text{m}$                | position of the Wnt- threshold $TP_{\text{Wnt}}$ for priming         | Fit: size of the Paneth cell compartment                     |
| $z_d$                                                                   | -87.5 $\mu\text{m}$               | position of the Wnt- threshold $TD_{\text{Wnt}}$ for differentiation | Fit: turnover and Brdu data                                  |
| $L_P^{\text{Paneth}}$                                                   | 0.35                              | Notch activation through Paneth cells                                | Fit: cell ratios                                             |
| $L_P^{\text{Goblet}}$                                                   | 1.00                              | Notch activation through Goblet cells                                | Set: maximum                                                 |
| $TD_{\text{Notch}}$                                                     | 1                                 | Notch-threshold                                                      | Set                                                          |
| $t_p$                                                                   | 57 days                           | lifetime of a Paneth cell                                            | [1]                                                          |

doi:10.1371/journal.pcbi.1001045.t001

decisions in cells not yet terminally differentiated. In principle we give all enterocyte progenitors the capability of acting as functional stem cells if they enter the spatial Wnt-niche at the crypt bottom. Likewise, cells primed to become Paneth or Goblet cells may revert their status depending on the local Notch and Wnt-signals. Although possible in principle, such cell fate reversions are only occasional events in steady state (e.g. less than 0.01 transitions per enterocyte progenitor into the undifferentiated state per day). They can, however, become more relevant in states of perturbation.

This concept implies that the loss of a single cell or of a few cells is immediately compensated for by neighbouring cells which can rapidly adapt due to local signalling and thereby provide robustness against tissue perturbations. We analysed the model robustness to a sudden elimination of selected cell populations from steady state conditions. In independent simulations we

separately deleted i) all undifferentiated cells, ii) all cells committed to the Paneth- cell lineage and iii) to the Goblet-cell lineage and finally iv) all enterocyte progenitors. A complete deletion of the undifferentiated cells at the crypt bottom only transiently affects the crypt system. This is in agreement with observations following the loss of functional *Lgr5* stem cells upon conditional deletion of the stem cell-specific transcription factor *ASCL2* [45]. In our simulations the steady state recovered after about 5 days following de-differentiation events of progenitor cells. At about the same time the Paneth cell pool was completely replenished following its deletion. Thereby, the increased commitment of undifferentiated cells into the Paneth cell lineage did not affect the number of undifferentiated cells. Regeneration of the Goblet cell and enterocyte compartment was also achieved within approximately 2 days and 4 days, respectively. Here, deletion of one compartment leads to a temporal increase of the other. In

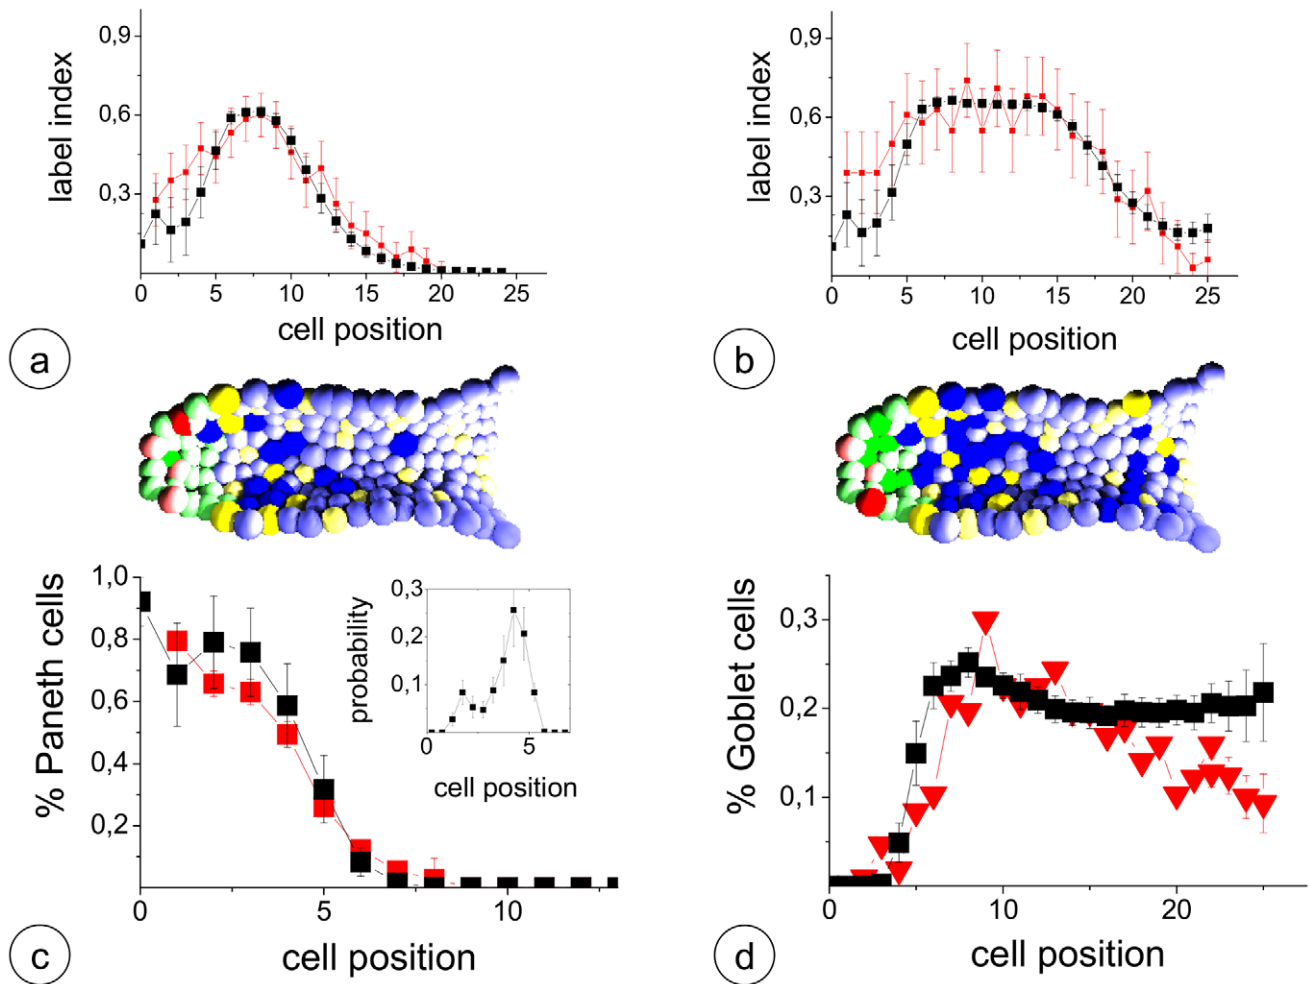

**Figure 2. Steady state crypt.** a,b) Positional BrdU label index obtained a) 2h and b) 24h after labelling. Experimental data: red, Simulation data: black. Bottom: Snapshots of simulated crypts. Colour code as in Fig. 1. Saturated colour indicates cells labelled for proliferation activity. c),d) Experimental and simulated distribution of c) Paneth, and d) Goblet cells in the crypt. Experimental data (red) were taken from [40] and [42], respectively. The insert in c) shows the simulated distribution of initial Paneth cell positions. A video showing an example of a steady state crypt simulation can be found in Video S1. doi:10.1371/journal.pcbi.1001045.g002

summary, our model predicts that each type of functional cells within the crypt could be transiently deleted, without the appearance of long-term adverse effects on crypt homeostasis. Only a deletion of the entire proliferative compartment, i.e. all undifferentiated and progenitor cells, eventually stops regenerative action and ‘kills’ the model crypt. Assuming irreversible fate decisions this kind of robust regeneration vanishes.

## Discussion

The spatio-temporal organisation of the intestinal epithelium has been modelled using several approaches [46,47,48,49]. The model presented here represents the most comprehensive model of intestinal stem cell and tissue organization proposed so far. It links a broad range of observed phenomena into one conceptual framework.

The model is based on single cells acting as individual agents, updating their status within a certain set of options governed by some active rules and on signals received from the environment. Thereby, it accounts for and requires the 3-D spatial structure of the crypt. The model describes how cell production and cell fate

decisions could be organized in steady state as well as under perturbations. Thus, the model offers a novel systems biological view on crypt stem cell and tissue organisation.

Recently, *Lgr-5* and *Bmi-1* have been identified as markers linked to functional stem cells in the small intestine [6,50]. In our model no stem cell population was implied. However, the *Lgr-5* positive subpopulation can be projected to the undifferentiated cell population at the very bottom of the crypt in our model system, although it may be not identical. *Bmi-1* positive cells could also be associated to the subpopulation of functional model stem cells which approach the Wnt-activity threshold  $TP_{Wnt}$ . We found that the behaviour of all these cells is in full accordance with the functional definition of stem cells [8].

Our simulation results suggest that any single subpopulation of the crypt could be deleted at a certain time point without any long term consequence for crypt organisation. While this prediction remains to be validated experimentally, it does raise additional questions regarding the origin of this kind of robustness. In our model, robust organisation of the intestine depends on the assumption of i) reversible and flexible fate decisions of stem cells and ii) an ‘externally’ defined Wnt-activity gradient.

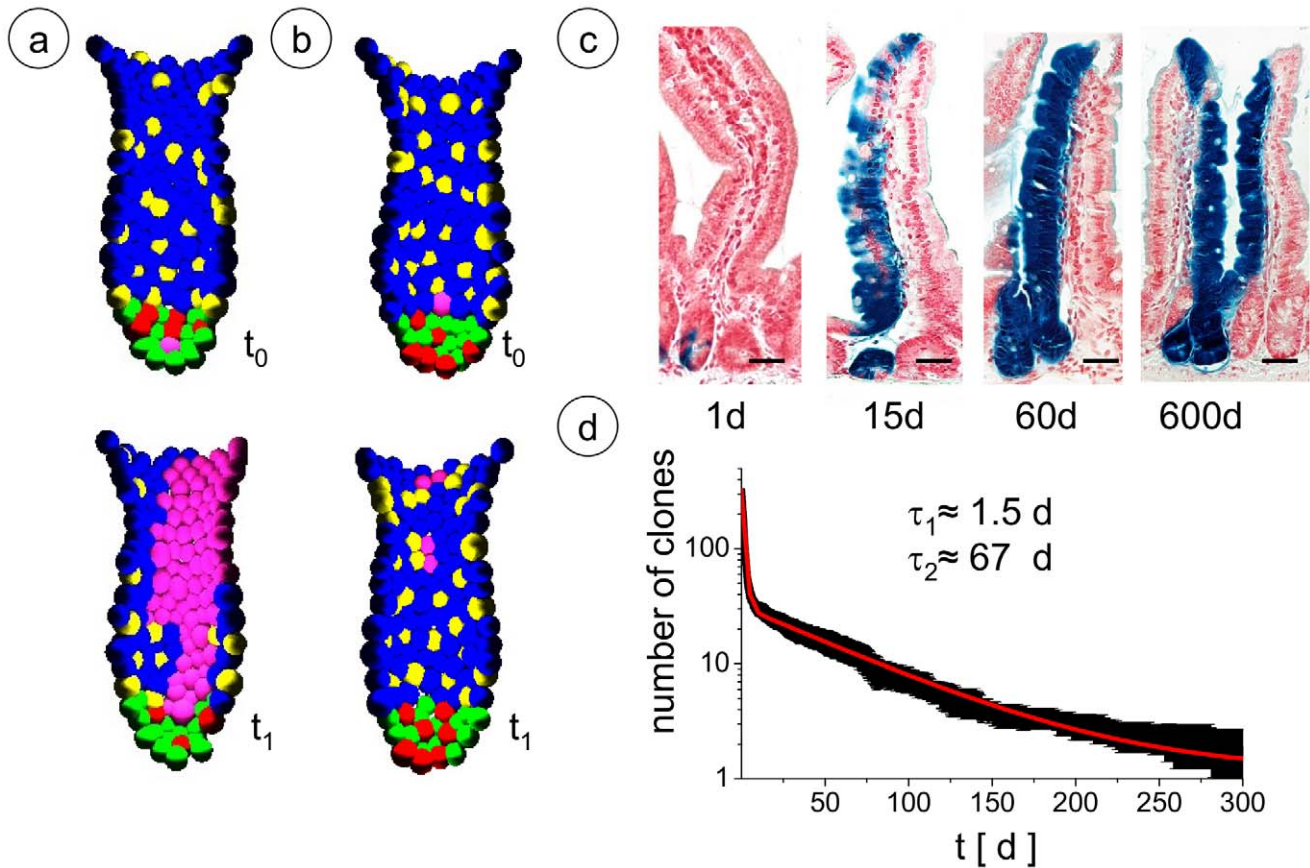

**Figure 3. Clonal dynamics.** a),b) Snapshots of simulated cell clones (pink) at labelling initiation ( $t_0$ ) and 7days later ( $t_1$ ) for clones derived from a) an undifferentiated functional stem cell and b) an enterocyte progenitor. Colour code as in Fig. 1. c) Clonal expansion in LGR5-EGFP-IRES-creERT2 knock-in mice crossed with Rosa26-lacZ reporter mice 1, 15, 60 and 600 days after tamoxifen injection [6]. The clones of LGR-5 expressing functional stem cells persist over long times. Bars: 50 $\mu$ m. d) Simulated clonal conversion in crypts: simulated data (black) and double exponential fit with time constants  $\tau_1$  and  $\tau_2$  (red). A video showing an example of a simulation of clonal conversion in a crypt can be found in Video S2.  
doi:10.1371/journal.pcbi.1001045.g003

There is increasing evidence of reversible and flexible fate decisions from other tissue modelling studies [51,52,53]. However, direct evidence for this phenomenon in the intestinal tissue is still missing. It could be provided for de-differentiation events by an experiment involving cell tracers. Tracing e.g. a cell which is already committed to the Paneth property, one would not observe the expansion of a large clone in case this fate decision is irreversible. In case the cell is capable of switching back into an undifferentiated state there is a certain probability to observe this event. This probability could be increased applying strong perturbation as e.g. radiation. Fate switches of a cell between different progenitor states would require continuous single cell imaging [54]. The in vitro organoid system introduced by Sato et al. [22] in principle enables such investigations.

Our assumption of the dependence of the Wnt-activity on local curvature of the tissue rises the question on the underlying molecular regulation. A possible link between surface curvature,  $\beta$ -catenin stabilisation and enforced Wnt-signalling could be provided for example by integrin-linked kinase activity [55,56]. Moreover, experimental results demonstrated that Wnt-signalling is required for apical constriction of epithelial cells during gastrulation in *C. elegans* [57]. It was hypothesised that this function is widely conserved in higher species [58]. Our line of argument would implicate a bi-directional relationship between local curvature and Wnt-expression, with Wnt-activity inducing

positive curvature and positive curvature enforcing Wnt-activity. Such dependence between morphogenes and tissue curvature was in fact suggested by Cummings [59] in a theoretical framework. As a result the intestinal crypt shape would be a self-organised feature. Actually, loss of Paneth cells in SOX9 deficient mice results in a changed crypt diameter [20] suggesting Paneth cells to induce local curvature.

A recent study by van Leeuwen et al. [48] focused on Wnt-signalling in the intestinal crypt. By combining models of molecular regulatory networks of Wnt-signalling and cell-cycle progression with a biomechanical model of the crypt epithelium they demonstrated that an extended Wnt-gradient along the crypt-villus axis is not required in order to explain the proliferative pattern in the crypt. They authors linked proliferative activity in the upper crypt to delays in Wnt-signalling. This opens the question whether terminal post-mitotic differentiation of enterocytes and Goblet cells is actually related to an external signal that the cells receive at a particular position or is the consequence of a maturation process that starts already with priming. We here assumed an external signal. Actually, this fate decision may not only involve the Wnt-pathway [25].

Our model predicts that many more cells than the actual functional stem cells at the crypt base can be clonogenic but that the probability a certain clone overtakes the entire crypt depends on the position of its initiation. In the model, this probability is

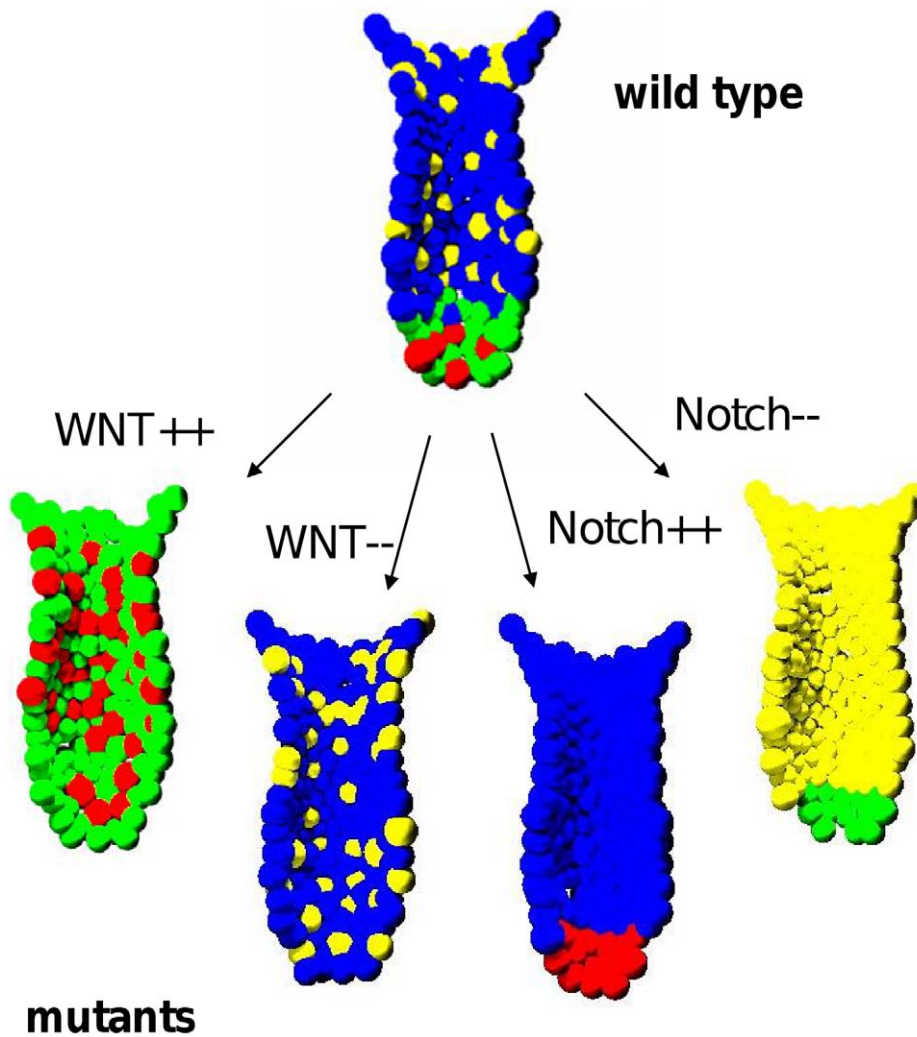

**Figure 4. Gain and loss of gene function studies.** Simulation results for crypt organisation following disturbed signalling. Colour code as in Fig. 1. **Wnt<sup>++</sup>**: Constitutive activation of Wnt in all cells leads to an expansion of the populations of undifferentiated and Paneth cells and a complete loss of Goblet and enterocyte progenitors. **Wnt<sup>--</sup>**: Reduced Wnt-signalling results in a complete loss of undifferentiated and Paneth cells. **Notch<sup>++</sup>**: Assuming constitutive active Notch-signalling in all cells completely suppresses the secretory lineages. **Notch<sup>--</sup>**: In contrast, a complete block of Notch-signalling results in full depletion of undifferentiated cells and the absorptive lineage.  
doi:10.1371/journal.pcbi.1001045.g004

directly related to the probability that the progeny of the clone reaches the crypt bottom. This prediction also remains valid for systems with de-regulated signalling. Clonal expansion of individual APC-mutant cells was recently shown to be effective for *Lgr-5* positive cells restricted to the crypt base [60]. This is in full accordance with our predictions.

Long living clones were suggested to profit from specific environmental interactions such as interaction with enteroendocrine cells expressing growth inhibitory peptides [61] or with specialised stroma cells, so-called myofibroblasts expressing e.g. BMP antagonists [62]. The impact of all these interactions on the system dynamics are not considered in our present model. Also effects like the potential co-regulation between active and quiescent subpopulations of functional stem cells [63] are beyond the scope of our model. We focussed on Wnt- and Notch-signalling as independent key regulators. Cross-talk [27,64] has not been considered. Interestingly, inhibition of BMP-signalling at the villus can lead to crypt *de novo* formation by crypt fission and adenoma polyp growth [65]. Our model is designed to encompass

such spatial dynamics. However, this will require incorporating a model of basal membrane reorganisation, which is currently in preparation. This model extension will permit to simulate scenarios of crypt formation, crypt budding and adenoma formation as a consequence of self-organised crypt shape.

The model proposed in this study comprehensively explains numerous experimental observations regarding spatial patterns of proliferation, clonal dynamics, cell lineage specification and differentiation under both normal steady state and disturbed regulation. Thereby, it combines features of the molecular, cellular and tissue levels, providing a simplified but consistent picture of the dynamic organisation of small intestinal crypts. We expect that the model can be specified according to the specific organisation of duodenum, jejunum, ileum and colon crypts by adapting specific parameter sets. The predictions provided in this study can be validated experimentally. Thus, we expect that our novel approach will provoke further discussion about somatic stem cell organisation and will stimulate future experimental and modelling research in the field.



## Materials and Methods

In the following we provide some details regarding the model, the fitting of experimental data, and experimental setups. In section A1) and A2) we describe the cell-cell and the cell-basal membrane (BM) interaction model, respectively. In section A3) the equations of motion are given and the update procedure of the internal state vector of the cells is explained. In section A4) the fitting strategy is described and some results on the effects of parameter variations are discussed. Finally, in section A5) material and methods of the BrdU labelling experiments and details of its simulation are provided.

### A1: Cell model and cell-cell interactions

An isolated cell is represented by an elastic sphere of radius  $R$  and volume  $V(R)$ . If a cell  $i$  gets into contact with another cell  $j$  the cells adhere. Their adhesive interaction energy is approximated by:

$$W_{ij}^A = \varepsilon A_{ij}^C \quad \text{with} \quad A_{ij}^C = \pi(R_i^2 - x_{ij}^2) \\ \text{and} \quad x_{ij} = \left( \frac{R_i^2 - R_j^2 + d_{ij}^2}{2d_{ij}} \right) \quad (\text{A1})$$

where  $\varepsilon$  denotes the adhesion energy per unit contact area and  $A_{ij}^C$  the contact area of the cells.  $A_{ij}^C$  depends on the radii of the cells  $R_i$ ,  $R_j$ , and on the distance  $d_{ij}$  between them. As a result of contact formation the shapes of the cells change by flattening at the contact area. Assuming that cells can be described by an isotropic homogenous elastic solid, the deformation energy for the contact is calculated using the Hertz model:

$$W_{ij}^D = \frac{2(R_i + R_j - d_{ij})^{5/2}}{5D} \sqrt{R_i R_j / (R_i + R_j)} \quad \text{with} \\ D = \frac{3}{2} \left( \frac{1 - \nu^2}{E} \right) \quad (\text{A2})$$

Here,  $E$  is the Young modulus and  $\nu$  the Poisson ratio of the cells. Additional to the shapes the volumes of the cells change during contact formation as well. The energy related with a volume change of a cell is approximated by the energy of a uniform compression (or inflation) of the spheres assuming a bulk modulus  $K$ :

$$W_i^K = \frac{K}{2V_i^T} (V_i^T - V_i^A)^2 \quad \text{with} \quad V_i^A = V_i(R_i) - \sum_j \Delta V_{ij}^C \\ \text{and} \quad \Delta V_{ij}^C = \frac{\pi}{3} (R_i - x_{ij})^2 (2R_i - x_{ij}) \quad (\text{A3})$$

Here,  $V_i^T$  is the target volume, i.e. the volume the cell would adopt if it were isolated.  $V_i^A$  is the actual volume of the cell which depends on its radius and the individual volume overlaps  $\Delta V_{ij}^C$  with all neighbouring cells ( $j$ ).

### A2: BM model and cell-BM interactions

In our approach the BM is modelled by a triangulated fiber network. This network is represented by its knots. These knots are assumed to be located at the crypt surface, which is defined by the following equation for the local crypt radius:

$$r(z) = r_0 \left( 1 + \lambda_1 \cos \left( 2\pi \frac{z}{z_0} + \frac{\pi}{2} \right) \right) \sqrt{\frac{2}{\pi} \arccos \left( \left( \frac{z}{z_0} \right)^{\lambda_2} \right)}. \quad (\text{A4})$$

Here  $z_0$  is the length of the crypt and  $r_0$  the radius of the crypt at the crypt-villus junction ( $z=0$ ). The parameters  $\lambda_1$  and  $\lambda_2$  are shape parameters. A further parameter of the network is the maximum inradius (mesh size) of its triangles  $\lambda_{\text{MAX}}$ . It was set narrow enough to avoid that cells can cross the network. In all simulations presented we used  $\lambda_{\text{MAX}} = 1.25 \mu\text{m}$ , corresponding to about 30.000 knots within the network of one crypt. On one hand this setting ensures low local variance of the network structure in terms of the coordination number. On the other hand it keeps the system computational tractable.

If the distance between a cell  $i$  and a knot  $k$  of the BM network  $d_{i,k}$  is smaller then the radius of the cell  $R_i$  they are assumed to interact. The interaction energy is modeled by:

$$W_{i,k}^{BM} = \frac{\varepsilon^{knot}}{N_i^{knot}} \left( \varpi \ln \left( \frac{d_{i,k}}{R_i} \right) - \frac{d_{i,k}}{R_i} \right), \quad (\text{A5})$$

where  $\varepsilon^{knot}$  denotes the maximum interaction energy per knot. While for  $d_{ij}$  larger then  $\Omega R_i$  the interaction is weakly adhesive, it becomes strongly repulsive for  $d_{ij}$  smaller then this threshold distance. The interaction energy is scaled by the number of knots  $N_i^{knot}$  interacting with cell ( $i$ ). This number has an upper limit depending on the ratio between cell and mesh size. Decreasing  $N_i^{knot}$  strengthens the interaction with the individual knots and thus, the total interaction of the cell with the network remains largely unaffected.

### A3: Cell motion and changes of the internal state vector

The generalized forces acting on cell  $i$  can be derived from the partial derivative of the interaction energies described above:

$$\mathbf{F}_i^{\text{det}} = \sum_j \frac{\partial (W_{ij}^A + W_{ij}^D + W_i^K)}{\partial d_{ij}} \mathbf{n}_{ij} + \sum_k \frac{\partial W_{i,k}^{BM}}{\partial d_{i,k}} \mathbf{n}_{i,k} \quad \text{and} \\ \mathbf{G}_i^{\text{det}} = \sum_j \frac{\partial (W_{ij}^A + W_{ij}^D + W_i^K)}{\partial R_i} \quad (\text{A6})$$

The distance  $d_{ij}$  is given by  $d_{ij} = |\mathbf{r}_{ij}| = |\mathbf{r}_i - \mathbf{r}_j|$  where  $\mathbf{r}_i$  and  $\mathbf{r}_j$  are the position vectors of cell  $i$  and  $j$ , respectively. In the same way  $r_{i,k}$  is the distance between cell  $i$  and the knot  $k$ .  $\mathbf{n}_{ij} = \mathbf{r}_{ij} / |\mathbf{r}_{ij}|$  and  $\mathbf{n}_{i,k} = \mathbf{r}_{i,k} / |\mathbf{r}_{i,k}|$ .

These forces organize the contacts between the cells by changing their distance or their radii. The resulting cell motion can be modeled using Langevin equations for each cell [36]. However, throughout this study we neglected fluctuations. Moreover, the small Reynolds numbers in the regime of single cells allowed us to neglect their inertia. Thus, cell motion was described by a system of linear differential equations, where the displacement  $d\mathbf{r}_i$  and the radius change  $dR_i$  of cell  $i$  are given by:

$$\eta_{BM} \frac{d\mathbf{r}_i}{dt} + \sum_j \eta_C A_{ij}^C \left( \frac{d\mathbf{r}_i}{dt} - \frac{d\mathbf{r}_j}{dt} \right) = \mathbf{F}_i^{\text{det}} \quad \text{and} \\ \eta_{VO} \frac{dR_i}{dt} + \sum_j \eta_C A_{ij}^C \left( \frac{dR_i}{dt} + \frac{dR_j}{dt} \right) = G_i^{\text{det}}. \quad (\text{A7})$$

The sums run over all neighboring cells  $j$  in direct contact to cell  $i$ .

The friction coefficients  $\eta_{\text{BM}}$  and  $\eta_{\text{VO}}$  describe friction between a cell and the BM and in course of volume changes, respectively. The friction between two cells is described by the coefficient  $\eta_{\text{C}}A_{\text{ij}}^{\text{C}}$  which is proportional to the contact area.

During each time step of a simulation position and radius of all cells are updated in parallel according to equation (A7). Thereby, a variable time step is used in order to avoid artificial cell interpenetration. Each update of position and radius potentially changes the internal state vector  $\Omega$  (Wnt- and Notch- activity,  $I_{\text{Wnt}}$ ,  $I_{\text{Notch}}$ ) of the individual cells. Thus,  $\Omega$  is updated subsequently. Thereby, the activity  $I_{\text{Wnt}}$ ,  $I_{\text{Notch}}$  may cross one or more threshold values ( $\text{TP}_{\text{Wnt}}$ ,  $\text{TD}_{\text{Wnt}}$ ,  $\text{TD}_{\text{Notch}}$ ). In this case the phenotype of the cells changes and all properties of the new phenotype - including the lineage characteristics, as well as migration and adhesion properties - are assigned to the cell.

In our model Wnt-activity is assumed to be a function  $f$  of the local curvature of the BM which itself is a function of the position along the crypt axis  $z$  (see Fig. 1):

$$I_{\text{Wnt}} = f(z). \quad (\text{A8})$$

We set the threshold values of the Wnt-activity  $\text{TP}_{\text{Wnt}}$  and  $\text{TD}_{\text{Wnt}}$  equal to  $f(z_{\text{p}})$  and  $f(z_{\text{d}})$  for lineage priming and terminal differentiation, respectively. Accordingly, changes of the cell fate occur if a cell crosses the position  $z_{\text{p}}$  or  $z_{\text{d}}$ . We used these threshold values as fit parameters to adjust the systems behavior (see A4 and Table 1). After fitting the model, the positions  $z < z_{\text{p}}$  cover the regions of high curvature. Moreover, at positions  $z_{\text{p}} < z < z_{\text{d}}$  both types of curvature are positive and nearly constant and at positions  $z > z_{\text{d}}$  the Gaussian curvature falls below zero. Thus, the fitting results are in full accordance with our assumptions of a correlation between Wnt-activity and positive curvature.

The Notch-activity is calculated via cell-cell contact analysis. A cell is Notch-activated by all cells being in direct contact with it and expressing Notch-ligands:

$$I_{\text{Notch}} = \sum_{\text{cell}} \delta(i,j) LP. \quad (\text{A9})$$

Here, the sum runs over all cells of the crypt.  $\delta(i,j)$  is equal to one if  $R_i + R_j > d_{ij}$  (condition of direct contact) otherwise it is zero. The degree of activation by a single cell (LP) depends on the cell type. LP is assumed to be larger than zero for Paneth and Goblet cells and zero for all other cells. In order to reproduce the correct cell patterning Paneth cells are required to induce weaker activation than Goblet cells (see A4 and Table 1). A cell changes its fate if its Notch-activity crosses the threshold  $\text{TD}_{\text{Notch}}$  (see also Table S3).

#### A4: Parameter variations and fitting strategy

In our model we assume that the Wnt-activity of the individual cells is determined by the local curvature of the basal membrane. Thus, the crypt geometry impacts the lineage specification and differentiation and consequently the crypt turnover. In order to study these interrelations we set the shape parameter  $\lambda_1$  to zero and varied the crypt length and width. By assigning the thresholds  $\text{TP}_{\text{WNT}}$  and  $\text{TD}_{\text{WNT}}$  fixed Gaussian curvatures  $4 \times 10^{-4} / \mu\text{m}^2$  and  $0 / \mu\text{m}^2$ , respectively, the shape changes resulted in a shifted position of these thresholds along the crypt axis. We found that the shape changes did result in quantitative changes of the systems behavior only. Selected results can be found in the Table S1. In all further simulations we considered a defined cell shape that agrees with experimental data on crypt geometry [8]. The

crypt with this defined shape is called ‘reference crypt’ in the following. The parameters of the reference crypt are listed in Table 1.

In a series of simulations we varied the threshold  $\text{TP}_{\text{Wnt}}$  for a reference crypt (see Table S2). In this case the total number of cells remains approximately fixed. The changes result in changes of the size of the Paneth cell compartment (undifferentiated and Paneth cells) which are balanced by changes of the number of enterocytes and Goblet cells. A decrease of the size of the Paneth cell compartment increases the number of proliferative cells in the crypt and thus decreases the turnover time. We selected the position of the threshold  $\text{TP}_{\text{Wnt}}$  such that cell number of the Paneth cell compartment is about 40 [40].

For a given position of  $\text{TP}_{\text{Wnt}}$  the steady state cell production of a crypt still depends on cell interaction parameters as well as internal parameters regulating fate decisions. For example the turnover is decreased as a result of an increase of the cell-cell interaction strength  $\epsilon_{\text{c}}$ , an increase of the sensitivity to contact inhibition  $V_{\text{p}}$  or a decrease of the Wnt-activity threshold  $\text{TD}_{\text{Wnt}}$ . We used  $\text{TD}_{\text{Wnt}}$ , together with  $F_{\text{A}}^{\text{other}}$  and  $\eta_{\text{BM}}$ , to fit the turnover the results of the BrdU labelling experiments.

This was most efficient provided that the average apoptosis rate in the crypt was smaller than about 5% per day. Such low apoptosis rates were ensured assuming a high cell-knot interaction constant  $\epsilon_{\text{k}} > 5 \text{ nNm}$  for all cells. Note that a migration force  $F_{\text{A}}^{\text{other}} > 0$  was required to fit the BrdU labelling data.

Steady state cell patterning also underlies a complex regulation as seen from the organisation of the Paneth cell population. For a given crypt geometry and Wnt-activity threshold  $\text{TP}_{\text{Wnt}}$  the sum of undifferentiated and Paneth cells is approximately fixed. Thereby, the number of Paneth cells depends sensitively on the cell-knot interaction strength  $\epsilon_{\text{k}}^{\text{paneth}}$ , the migration force for Paneth cells  $F_{\text{A}}^{\text{paneth}}$  and the Notch-activation strength  $\text{LP}^{\text{paneth}}$ . Stable Paneth cell adhesion to the BM over their life time  $t_{\text{p}}$  required  $\epsilon_{\text{k}}^{\text{paneth}} \geq 35 \text{ nN}$  defining a constraint to this parameter. Moreover, a minimum ‘migration force’  $F_{\text{A}}^{\text{paneth}}$  of about 7nN is required to ensure that Paneth cells remain confined at the crypt bottom. Thus, we adjusted the number of Paneth cells using  $\text{LP}^{\text{paneth}}$  (Fig. 5).

#### A5: BrdU labeling experiments and simulation

**Experiments.** To examine proliferating cells 2 mg/ml BrdU (Sigma-Aldrich, Deisenhofen, Germany)/PBS was injected i.p. into mice (50mg/kg b.w.). Mice were sacrificed 2 and 24 hrs after injection. The bowel segments were fixed in 4% paraformaldehyd/PBS and paraffin embedded. In 4 $\mu\text{m}$  sections proliferating cells were detected after blocking endogenous peroxidase activity in 3%  $\text{H}_2\text{O}_2$ /PBS for 10 min, 2N HCl DNA denaturation for 30 min and enzymatic pretreatment with 0.1% (w/v) Trypsin (SIGMA) for 20 min by incubating with an anti-BrdU monoclonal antibody (Sigma) for 2 hrs (all steps at 37°C) followed by the Vectastain® ABC kit (Vector Laboratories, Burlingame, US). Finally, sections were counter-stained with hematoxylin, dehydrated and mounted. Fifty half-crypts per mouse were scored on a cell positional basis according to whether or not cells were BrdU positive.

**Modeling.** These experiments were simulated assuming that 70% of the proliferating cells were marked. This number was chosen somewhat larger than the fraction of the cell cycle time belonging to the S-phase (50–60%<sup>37</sup>), accounting for an extended labeling time. Labels were inherited to the entire progeny. Sections of 4.5 $\mu\text{m}$  were analyzed.

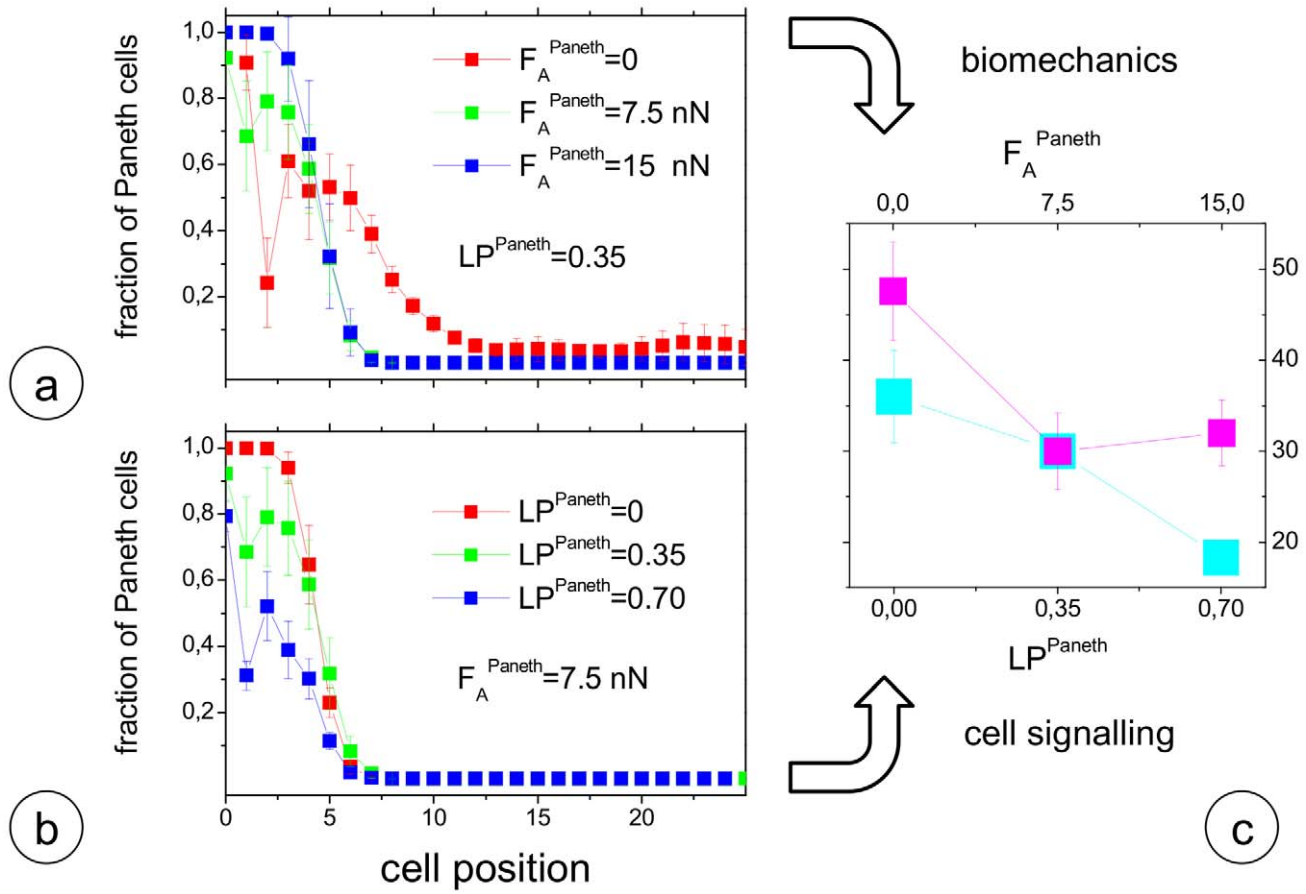

**Figure 5. Paneth cell distribution and numbers are affected by biomechanics as well as cell signalling.** a) Local fraction of Paneth cells in dependence of their migration force  $F_A^{\text{Paneth}}$ . b) Local fraction of Paneth cells in dependence of their Notch-activation strength  $LP^{\text{Paneth}}$ . All other parameters of the model are fix (see Table 1). c) Average total number of Paneth cells as obtained in simulations changing  $F_A^{\text{Paneth}}$  (pink squares, compare a)) and changing  $LP^{\text{Paneth}}$  (cyan squares, compare b)).  
doi:10.1371/journal.pcbi.1001045.g005

## Supporting Information

**Table S1** Simulation results on the impact of the crypt shape on the systems behaviour. For a simple crypt shape ( $\lambda_1 = 0$ ) the length and width of the crypt was changed, by changing the parameter  $z_0$  and  $r_0$ . The thresholds  $TP_{\text{Wnt}}$  and  $TD_{\text{Wnt}}$  were set to the positions of Gaussian curvature  $4 \times 10^{-4} / \mu\text{m}^2$  and  $0 / \mu\text{m}^2$ , respectively (see black lines). Increasing length increases the number of cells leaving the crypt thereby the turnover time remains approximately constant. Increasing width increases the turnover time, i.e. the outgrowth is less efficient.

Found at: doi:10.1371/journal.pcbi.1001045.s001 (0.55 MB TIF)

**Table S2** Simulation results on the impact of the position of the threshold  $TP_{\text{Wnt}}$  on the systems behavior. Moving down the position of  $TP_{\text{Wnt}}$  (black lines) to the crypt bottom leads to a faster turnover. This refers to a decreasing number of Paneth cells which is mainly balanced by proliferative enterocyte progenitors. For positions  $x_p > x_0$  the system resembles the situation of a Wnt-system discussed in the text (Fig. 3).

Found at: doi:10.1371/journal.pcbi.1001045.s002 (0.47 MB TIF)

**Table S3** Simulation results on the impact of the threshold  $TP_{\text{Notch}}$  on the systems behaviour. Increasing the threshold leads to an increased number of secretory cells in the crypt at the

expense of undifferentiated cells and enterocyte progenitors. Note that the number of Goblet cell increases only if  $TP_{\text{Notch}}$  becomes larger than 1 due to discrete numbers of neighbour cells. At a certain value of  $TP_{\text{Notch}}$  stimulation by the neighbour cell is no longer sufficient and all cells will turn on secretory fates. In this case the system resembles the situation of a Notch-system discussed in the text (Fig. 3).

Found at: doi:10.1371/journal.pcbi.1001045.s003 (0.48 MB TIF)

**Video S1** Example of a simulation of a steady state crypt. Undifferentiated cells (red) and Paneth cells (green) are found intermingled at the crypt bottom, progenitors of enterocytes (blue) and Goblet cells (yellow) move upwards the crypt axis. One second of the video represents 1.25 days.

Found at: doi:10.1371/journal.pcbi.1001045.s004 (3.03 MB AVI)

**Video S2** Example of simulated clonal conversion in a crypt. A labelled cell clone (pink), expands in the crypt. It originates from an undifferentiated functional stem cell. Colour code of crypt cells as in Video S1. One second of the video represents 1.25 days.

Found at: doi:10.1371/journal.pcbi.1001045.s005 (2.58 MB AVI)

## Acknowledgments

We like to thank Owen Sansom and Johan van Es for providing experimental data on mutation experiments.

## Author Contributions

Conceived and designed the experiments: NB HC. Performed the experiments: NB GA. Analyzed the data: PB JG. Wrote the paper: JG

## References

- Ireland H, Houghton C, Howard L, Winton DJ (2005) Cellular inheritance of a Cre-activated reporter gene to determine Paneth cell longevity in the murine small intestine. *Dev Dyn* 233: 1332–1336.
- Potten CS (1975) Kinetics and possible regulation of crypt cell populations under normal and stress conditions. *Bull Cancer* 62: 419–430.
- Barker N, van de Wetering M, Clevers H (2008) The intestinal stem cell. *Genes Dev* 22: 1856–1864.
- Brittan M, Wright NA (2002) Gastrointestinal stem cells. *J Pathol* 197: 492–509.
- Scoville DH, Sato T, He XC, Li L (2008) Current view: intestinal stem cells and signaling. *Gastroenterology* 134: 849–864.
- Barker N, van Es JH, Kuipers J, Kujala P, van den Born M, et al. (2007) Identification of stem cells in small intestine and colon by marker gene *Lgr5*. *Nature* 449: 1003–1007.
- Sangiorgi E, Capecchi MR (2009) Bmi1 lineage tracing identifies a self-renewing pancreatic acinar cell subpopulation capable of maintaining pancreatic organ homeostasis. *Proc Natl Acad Sci U S A* 106: 7101–7106.
- Potten CS, Loeffler M (1990) Stem cells: attributes, cycles, spirals, pitfalls and uncertainties. Lessons for and from the crypt. *Development* 110: 1001–1020.
- Potten CS, Gandara R, Mahida YR, Loeffler M, Wright NA (2009) The stem cells of small intestinal crypts: where are they? *Cell Prolif* 42: 731–750.
- Montgomery RK, Breault DT (2008) Small intestinal stem cell markers. *J Anat* 213: 52–58.
- Korinek V, Barker N, Moerer P, van Donselaar E, Huls G, et al. (1998) Depletion of epithelial stem-cell compartments in the small intestine of mice lacking *Tcf4*. *Nat Genet* 19: 379–383.
- van Es JH, van Gijn ME, Riccio O, van den Born M, Vooijs M, et al. (2005) Notch/ $\gamma$ -secretase inhibition turns proliferative cells in intestinal crypts and adenomas into goblet cells. *Nature* 435: 959–963.
- Hoffmann M, Chang HH, Huang S, Ingber DE, Loeffler M, et al. (2008) Noise-driven stem cell and progenitor population dynamics. *PLoS One* 3: e2922.
- Loeffler M, Roeder I (2002) Tissue stem cells: definition, plasticity, heterogeneity, self-organization and models—a conceptual approach. *Cells Tissues Organs* 171: 8–26.
- Loeffler M, Roeder I (2004) Conceptual models to understand tissue stem cell organization. *Curr Opin Hematol* 11: 81–87.
- van der Flier LG, Clevers H (2009) Stem cells, self-renewal, and differentiation in the intestinal epithelium. *Annu Rev Physiol* 71: 241–260.
- Gregorieff A, Clevers H (2005) Wnt signaling in the intestinal epithelium: from endoderm to cancer. *Genes Dev* 19: 877–890.
- van de Wetering M, Sancho E, Verweij C, de Lau W, Oving I, et al. (2002) The beta-catenin/TCF4 complex imposes a crypt progenitor phenotype on colorectal cancer cells. *Cell* 111: 241–250.
- Battle E, Henderson JT, Beghtel H, van den Born MM, Sancho E, et al. (2002) Beta-catenin and TCF mediate cell positioning in the intestinal epithelium by controlling the expression of *EphB/ephrinB*. *Cell* 111: 251–263.
- Bastide P, Darido C, Pannequin J, Kist R, Robine S, et al. (2007) *Sox9* regulates cell proliferation and is required for Paneth cell differentiation in the intestinal epithelium. *J Cell Biol* 178: 635–648.
- Andreu P, Colnot S, Godard C, Gad S, Chafey P, et al. (2005) Crypt-restricted proliferation and commitment to the Paneth cell lineage following *Apc* loss in the mouse intestine. *Development* 132: 1443–1451.
- Sato T, Vries RG, Snippert HJ, van de Wetering M, Barker N, et al. (2009) Single *Lgr5* stem cells build crypt-villus structures in vitro without a mesenchymal niche. *Nature* 459: 262–265.
- Ingber DE (2005) Mechanical control of tissue growth: function follows form. *Proc Natl Acad Sci U S A* 102: 11571–11572.
- Nelson CM, Jean RP, Tan JL, Liu WF, Sniadecki NJ, et al. (2005) Emergent patterns of growth controlled by multicellular form and mechanics. *Proc Natl Acad Sci U S A* 102: 11594–11599.
- Radtke F, Clevers H (2005) Self-renewal and cancer of the gut: two sides of a coin. *Science* 307: 1904–1909.
- Nakamura T, Tsuchiya K, Watanabe M (2007) Crosstalk between Wnt and Notch signaling in intestinal epithelial cell fate decision. *J Gastroenterol* 42: 705–710.
- Ehebauer M, Hayward P, Arias AM (2006) Notch, a universal arbiter of cell fate decisions. *Science* 314: 1414–1415.
- Buchert M, Athineos D, Abud HE, Burke ZD, Faux MC, et al. (2010) Genetic dissection of differential signaling threshold requirements for the Wnt/ $\beta$ -catenin pathway in vivo. *PLoS Genet* 6: e1000816.
- Sprinzak D, Lakhpanal A, Lebon L, Santat LA, Fontes ME, et al. (2010) Cis-interactions between Notch and Delta generate mutually exclusive signalling states. *Nature* 465: 86–90.
- Collier JR, Monk NA, Maini PK, Lewis JH (1996) Pattern formation by lateral inhibition with feedback: a mathematical model of delta-notch intercellular signalling. *J Theor Biol* 183: 429–446.
- Fre S, Huyghe M, Mourikis P, Robine S, Louvard D, et al. (2005) Notch signals control the fate of immature progenitor cells in the intestine. *Nature* 435: 964–968.
- van Es JH, Jay P, Gregorieff A, van Gijn ME, Jonkheer S, et al. (2005) Wnt signalling induces maturation of Paneth cells in intestinal crypts. *Nat Cell Biol* 7: 381–386.
- Fevr T, Robine S, Louvard D, Huelsken J (2007) Wnt/ $\beta$ -catenin is essential for intestinal homeostasis and maintenance of intestinal stem cells. *Mol Cell Biol* 27: 7551–7559.
- Sansom OJ, Reed KR, Hayes AJ, Ireland H, Brinkmann H, et al. (2004) Loss of *Apc* in vivo immediately perturbs Wnt signaling, differentiation, and migration. *Genes Dev* 18: 1385–1390.
- Mori-Akiyama Y, van den Born M, van Es JH, Hamilton SR, Adams HP, et al. (2007) *SOX9* is required for the differentiation of paneth cells in the intestinal epithelium. *Gastroenterology* 133: 539–546.
- Galle J, Loeffler M, Drasdo D (2005) Modeling the effect of deregulated proliferation and apoptosis on the growth dynamics of epithelial cell populations in vitro. *Biophys J* 88: 62–75.
- Galle J, Hoffmann M, Aust G (2009) From single cells to tissue architecture—a bottom-up approach to modelling the spatio-temporal organisation of complex multi-cellular systems. *J Math Biol* 58: 261–283.
- Bullen TF, Forrest S, Campbell F, Dodson AR, Hershman MJ, et al. (2006) Characterization of epithelial cell shedding from human small intestine. *Lab Invest* 86: 1052–1063.
- Marshman E, Ottewill PD, Potten CS, Watson AJ (2001) Caspase activation during spontaneous and radiation-induced apoptosis in the murine intestine. *J Pathol* 195: 285–292.
- Chwalinski S, Potten CS (1989) Crypt base columnar cells in ileum of BDF1 male mice—their numbers and some features of their proliferation. *Am J Anat* 186: 397–406.
- Bjerknes M, Cheng H (1981) The stem-cell zone of the small intestinal epithelium. II. Evidence from paneth cells in the newborn mouse. *Am J Anat* 160: 65–75.
- Paulus U, Loeffler M, Zeidler J, Owen G, Potten CS (1993) The differentiation and lineage development of goblet cells in the murine small intestinal crypt: experimental and modelling studies. *J Cell Sci* 106(Pt 2): 473–483.
- Li YQ, Roberts SA, Paulus U, Loeffler M, Potten CS (1994) The crypt cycle in mouse small intestinal epithelium. *J Cell Sci* 107(Pt 12): 3271–3279.
- Winton DJ, Ponder BA (1990) Stem-cell organization in mouse small intestine. *Proc Biol Sci* 241: 13–18.
- van der Flier LG, van Gijn ME, Hatzis P, Kujala P, Haegebarth A, et al. (2009) Transcription factor achaete scute-like 2 controls intestinal stem cell fate. *Cell* 136: 903–912.
- Potten CS, Loeffler M (1987) A comprehensive model of the crypts of the small intestine of the mouse provides insight into the mechanisms of cell migration and the proliferation hierarchy. *J Theor Biol* 127: 381–391.
- Gerike TG, Paulus U, Potten CS, Loeffler M (1998) A dynamic model of proliferation and differentiation in the intestinal crypt based on a hypothetical intraepithelial growth factor. *Cell Prolif* 31: 93–110.
- van Leeuwen IM, Mirams GR, Walter A, Fletcher A, Murray P, et al. (2009) An integrative computational model for intestinal tissue renewal. *Cell Prolif* 42: 617–636.
- Meinke FA, Potten CS, Loeffler M (2001) Cell migration and organization in the intestinal crypt using a lattice-free model. *Cell Prolif* 34: 253–266.
- Sangiorgi E, Capecchi MR (2008) *Bmi1* is expressed in vivo in intestinal stem cells. *Nat Genet* 40: 915–920.
- Roeder I, Horn M, Glauche I, Hochhaus A, Mueller MC, et al. (2006) Dynamic modeling of imatinib-treated chronic myeloid leukemia: functional insights and clinical implications. *Nat Med* 12: 1181–1184.
- Krinner A, Zscharnack M, Bader A, Drasdo D, Galle J (2009) Impact of oxygen environment on mesenchymal stem cell expansion and chondrogenic differentiation. *Cell Prolif* 42: 471–484.
- Roeder I, Horn K, Sieburg HB, Cho R, Muller-Sieburg C, et al. (2008) Characterization and quantification of clonal heterogeneity among hematopoietic stem cells: a model-based approach. *Blood* 112: 4874–4883.
- Eilken HM, Nishikawa S, Schroeder T (2009) Continuous single-cell imaging of blood generation from haemogenic endothelium. *Nature* 457: 896–900.
- Oloumi A, McPhee T, Dedhar S (2004) Regulation of E-cadherin expression and  $\beta$ -catenin/Tcf transcriptional activity by the integrin-linked kinase. *Biochim Biophys Acta* 1691: 1–15.
- Oloumi A, Syam S, Dedhar S (2006) Modulation of Wnt3a-mediated nuclear  $\beta$ -catenin accumulation and activation by integrin-linked kinase in mammalian cells. *Oncogene* 25: 7747–7757.
- Lee JY, Marston DJ, Walston T, Hardin J, Halberstadt A, et al. (2006) Wnt/*Frizzled* signaling controls *C. elegans* gastrulation by activating actomyosin contractility. *Curr Biol* 16: 1986–1997.

58. Chisholm AD (2006) Gastrulation: Wnts signal constriction. *Curr Biol* 16: R874–876.
59. Cummings FW (2001) The interaction of surface geometry with morphogens. *J Theor Biol* 212: 303–313.
60. Barker N, Ridgway RA, van Es JH, van de Wetering M, Begthel H, et al. (2009) Crypt stem cells as the cells-of-origin of intestinal cancer. *Nature* 457: 608–611.
61. Radford IR, Lobachevsky PN (2006) An enteroendocrine cell-based model for a quiescent intestinal stem cell niche. *Cell Prolif* 39: 403–414.
62. Yen TH, Wright NA (2006) The gastrointestinal tract stem cell niche. *Stem Cell Rev* 2: 203–212.
63. Li L, Clevers H (2010) Coexistence of quiescent and active adult stem cells in mammals. *Science* 327: 542–545.
64. Jin YH, Kim H, Ki H, Yang I, Yang N, et al. (2009) Beta-catenin modulates the level and transcriptional activity of Notch1/NICD through its direct interaction. *Biochim Biophys Acta* 1793: 290–299.
65. Haramis AP, Begthel H, van den Born M, van Es J, Jonkheer S, et al. (2004) De novo crypt formation and juvenile polyposis on BMP inhibition in mouse intestine. *Science* 303: 1684–1686.
